# Supplementary material for: Eukaryotic Microbiomes of Membrane-Attached Biofilms in Membrane Bioreactors Analyzed by High-Throughput Sequencing and Microscopic Observations
Source: PubMed Central journal article supplement (PMC5877349; doi:10.1264/jsme2.me17112), 2018-03-29
Supplement: 33_98_s1.pdf [file 33_98_s1.pdf]

## **Supplemental information**

**Supplemental Table S1.** Summary of Illumina sequencing results.

| Sample             | Loading conditions                                       |         | Number of sequences | Number of OTUs | $C_x^a$      | Diversity indices <sup>b</sup> |           |           |           |
|--------------------|----------------------------------------------------------|---------|---------------------|----------------|--------------|--------------------------------|-----------|-----------|-----------|
|                    | Volumetric load (mgCOD L <sup>-1</sup> d <sup>-1</sup> ) | HRT (d) |                     |                |              | Chao1                          | Shannon   | 1/Simpson |           |
| Piggery wastewater |                                                          |         | 41262±418           | 96±15          | 0.998±0.0004 | 208±28                         | 1.77±0.12 | 1.76±0.10 |           |
|                    | Seed                                                     |         | 33235±168           | 473±0          | 0.986±0.0001 | 919±0                          | 4.54±0.29 | 7.61±2.20 |           |
| Biofilm            | Unstable                                                 | 704     | 6                   | 30581±1922     | 350±20       | 0.988±0.0014                   | 1046±113  | 4.56±0.05 | 7.93±0.10 |
|                    | Stable                                                   | 704     | 6                   | 20656±418      | 269±81       | 0.986±0.0027                   | 998±177   | 3.29±0.37 | 3.58±0.99 |
|                    | Deteriorative                                            | 1,407   | 3                   | 50017±418      | 264±8        | 0.995±0.0005                   | 494±83    | 2.03±0.12 | 1.84±0.11 |
| Sludge             | Unstable                                                 | 704     | 6                   | 23661±1148     | 437±33       | 0.991±0.0009                   | 680±29    | 2.83±0.03 | 2.96±0.01 |
|                    | Stable                                                   | 704     | 6                   | 34694±2732     | 955±35       | 0.980±0.0001                   | 1375±22   | 3.78±0.12 | 4.44±0.16 |
|                    | Deteriorative                                            | 1,407   | 3                   | 30581±1922     | 933±43       | 0.985±0.0014                   | 1173±93   | 3.69±0.21 | 4.01±0.33 |

<sup>a</sup>Calculated from the equation  $C_x = 1 - (n/N)$ , where “n” is the number of singleton OTUs and N is the total number of sequences.

<sup>b</sup>Each index was calculated based on an equal number of sequences ( $n=9,838$ ). All data presented are based on the average of two replicates.

**Supplemental Table S2.** Ten most abundant operational taxonomic units (OTUs) in sludge under unstable, stable, and deteriorative conditions.

| OTU ID                                              | Eukaryotic microorganisms |                                     | Accession No. | Identity (%) | Relative abundance <sup>a</sup> (%) | Fold change <sup>b</sup> |
|-----------------------------------------------------|---------------------------|-------------------------------------|---------------|--------------|-------------------------------------|--------------------------|
|                                                     | Kingdom/<br>phylum        | Species                             |               |              |                                     |                          |
| <b>Unstable (non-acclimatized)</b>                  |                           |                                     |               |              |                                     |                          |
| 117                                                 | <i>Fungi</i>              | <i>Hyaloraphidium curvatum</i>      | NG017172      | 84           | 53.14                               | 2.1                      |
| 6492                                                | <i>Metazoa</i>            | <i>Isohypsibius granulifer</i>      | EF620403      | 98           | 25.38                               | 71.3                     |
| 11958                                               | <i>Cercozoa</i>           | <i>Rhogostoma minus</i>             | LC032468      | 97           | 1.92                                | 6.6                      |
| 17603                                               | <i>Metazoa</i>            | <i>Polyarthra remata</i>            | DQ297716      | 95           | 1.33                                | 2.6                      |
| 14625                                               | <i>Fungi</i>              | <i>Hyaloraphidium curvatum</i>      | NG017172      | 82           | 1.23                                | 2.4                      |
| 4676                                                | <i>Metazoa</i>            | <i>Isohypsibius granulifer</i>      | EF620403      | 95           | 1.13                                | 90.2                     |
| 16984                                               | <i>Fungi</i>              | <i>Hyaloraphidium curvatum</i>      | NG017172      | 83           | 1.13                                | 2.5                      |
| 10633                                               | <i>Metazoa</i>            | <i>Isohypsibius granulifer</i>      | EF620403      | 95           | 1.12                                | —                        |
| 13663                                               | <i>Fungi</i>              | <i>Hyaloraphidium curvatum</i>      | NG017172      | 83           | 0.98                                | 5.2                      |
| 12713                                               | <i>Cercozoa</i>           | <i>Cryothecomonas aestivalis</i>    | AF290541      | 82           | 0.93                                | 24.3                     |
| <b>Stable (acclimatized)</b>                        |                           |                                     |               |              |                                     |                          |
| 4403                                                | <i>Metazoa</i>            | <i>Habrotrocha bidens</i>           | KM043258      | 100          | 43.22                               | 8.6                      |
| 17845                                               | <i>Ciliphora</i>          | <i>Campanella umbellaria</i>        | AF401524      | 88           | 20.61                               | 0.4                      |
| 14179                                               | <i>Opisthokont</i> *      | <i>Salpingoeca tuba</i>             | HQ026774      | 87           | 6.47                                | 0.4                      |
| 117                                                 | <i>Fungi</i>              | <i>Hyaloraphidium curvatum</i>      | NG017172      | 84           | 3.19                                | 2.1                      |
| 16432                                               | <i>Metazoa</i>            | <i>Habrotrocha bidens</i>           | KM043258      | 100          | 2.79                                | 8.3                      |
| 1610                                                | <i>Fungi</i>              | <i>Mortierella clonocystis</i>      | HQ667479      | 85           | 2.20                                | 2.7                      |
| 467                                                 | <i>Fungi</i>              | <i>Paramicrosporidium vannellae</i> | JQ796368      | 86           | 2.08                                | 1.2                      |
| 3603                                                | <i>Cercozoa</i>           | <i>Orciraptor agilis</i>            | KF207875      | 81           | 1.85                                | 4.4                      |
| 18072                                               | <i>Metazoa</i>            | <i>Encentrum astridae</i>           | DQ297695      | 98           | 1.66                                | 5.8                      |
| 19347                                               | <i>Ciliphora</i>          | <i>Opercularia microdiscum</i>      | AF401525      | 88           | 1.66                                | 2.9                      |
| <b>Deteriorative (acclimatized but overloading)</b> |                           |                                     |               |              |                                     |                          |
| 17845                                               | <i>Ciliphora</i>          | <i>Campanella umbellaria</i>        | AF401524      | 88           | 48.04                               | 5.9                      |
| 4403                                                | <i>Metazoa</i>            | <i>Habrotrocha bidens</i>           | KM043258      | 100          | 14.80                               | 6.6                      |
| 16518                                               | <i>Metazoa</i>            | <i>Macrobotus sapiens</i>           | DQ839601      | 96           | 5.47                                | 1.5                      |
| 16474                                               | <i>Fungi</i>              | <i>Hyaloraphidium curvatum</i>      | NG017172      | 84           | 5.03                                | 2.9                      |
| 19310                                               | <i>Dinoflagellata</i>     | <i>Exuviaella pusilla</i>           | DQ388459      | 91           | 3.26                                | 4.9                      |
| 3603                                                | <i>Cercozoa</i>           | <i>Orciraptor agilis</i>            | KF207875      | 81           | 2.51                                | 4.3                      |
| 117                                                 | <i>Fungi</i>              | <i>Hyaloraphidium curvatum</i>      | NG017172      | 84           | 2.02                                | 7.7                      |
| 467                                                 | <i>Fungi</i>              | <i>Paramicrosporidium vannellae</i> | JQ796368      | 86           | 1.97                                | 4.7                      |
| 19347                                               | <i>Cercozoa</i>           | <i>Opercularia microdiscum</i>      | AF401525      | 88           | 1.52                                | 10.3                     |
| 16432                                               | <i>Metazoa</i>            | <i>Habrotrocha bidens</i>           | KM043258      | 100          | 1.06                                | 8.5                      |

<sup>a</sup>Relative abundance represents average values of two independent determinations.

<sup>b</sup>Fold changes relative to the biofilm are shown.

\*Phylum level classification is uncertain, and classified as the unranked taxon *Opisthokont*.

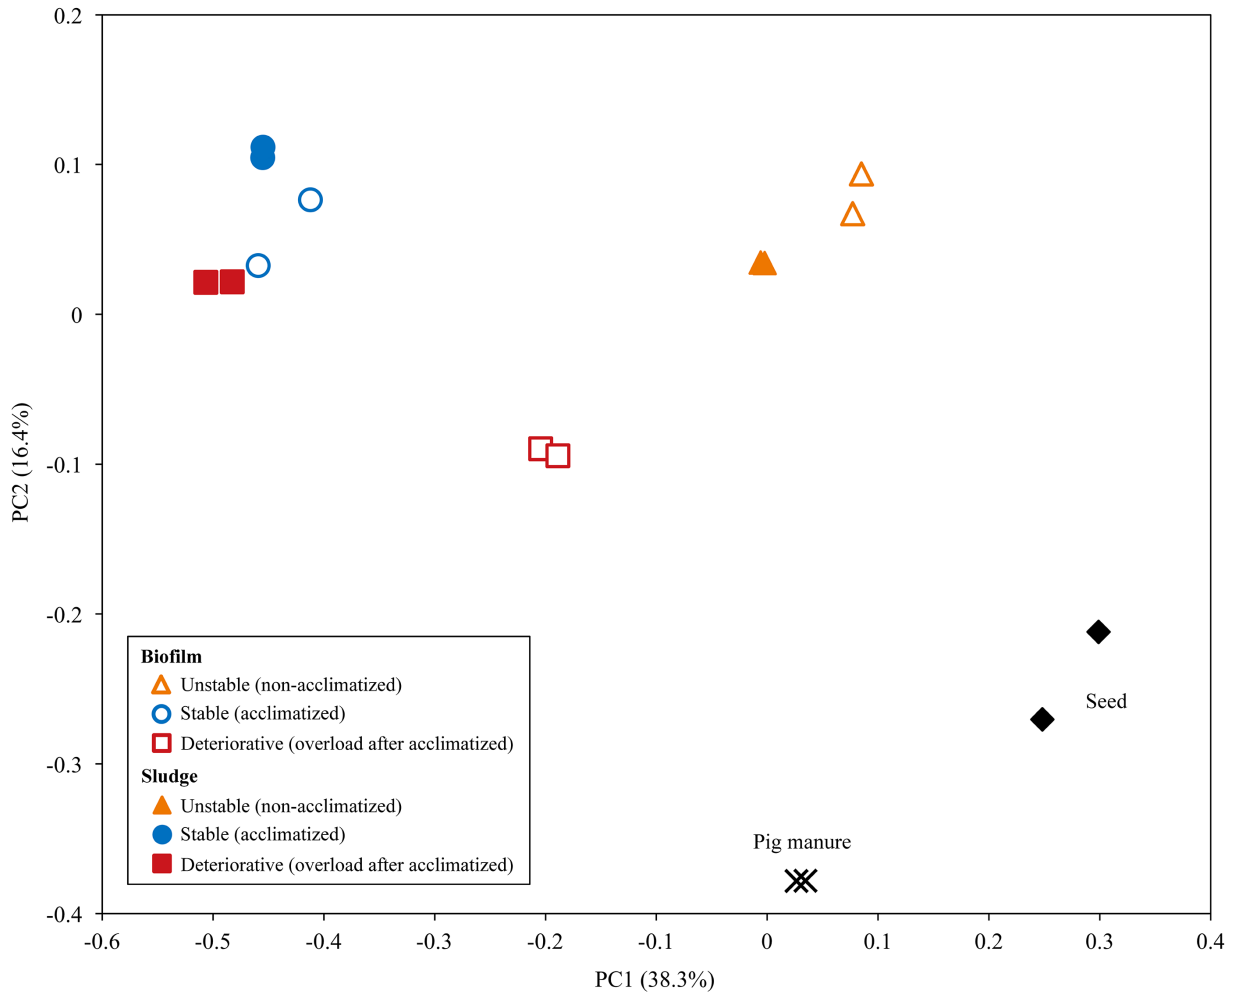

**Supplemental Fig. S1.** Comparison of biofilm and sludge microbiomes during piggery wastewater treatment. A principal coordinate analysis (PCoA) scatter plot of 18S rRNA genes obtained via Illumina sequencing. Weighted UniFrac distances were calculated based on an equal number ( $n=9,838$ ) of sequences. Open and closed symbols indicate sludge and biofilm microbiomes, respectively, while the symbol type indicates reactor conditions.
